# Supplementary material for: luxRI homologs are universally present in the genus Aeromonas
Source: PubMed Central journal article supplement (PMC2180181; doi:10.1186/1471-2180-7-93), 2007-10-23
Supplement: 1471-2180-7-93-S1.pdf [file 1471-2180-7-93-S1.pdf]

**Additional Table 1: Similarity Matrix for the *luxR* homologs.** Percentage sequence similarity (lower left) and number of nucleotide differences (top right).

|    | 1                                                           | 2     | 3     | 4     | 5     | 6     | 7     | 8     | 9     |       |
|----|-------------------------------------------------------------|-------|-------|-------|-------|-------|-------|-------|-------|-------|
| 1  | <i>A. hydrophila</i> (X89469)                               |       | 35    | 5     | 32    | 42    | 33    | 105   | 41    | 132   |
| 2  | <i>A. salmonicida</i> (U65741)                              | 95.49 |       | 38    | 24    | 11    | 29    | 107   | 54    | 137   |
| 3  | <i>A. hydrophila</i> ATCC 7966 <sup>T</sup>                 | 99.36 | 95.14 |       | 31    | 43    | 32    | 102   | 40    | 133   |
| 4  | <i>A. bestiarum</i> ATCC 51108 <sup>T</sup>                 | 95.88 | 96.90 | 96.04 |       | 23    | 7     | 105   | 41    | 136   |
| 5  | <i>A. hydrophila</i> CDC 0434-84                            | 94.58 | 98.58 | 94.46 | 97.06 |       | 24    | 111   | 57    | 141   |
| 6  | <i>A. caviae</i> ATCC 15468 <sup>T</sup>                    | 95.74 | 96.29 | 95.88 | 99.11 | 96.90 |       | 106   | 44    | 136   |
| 7  | <i>A. media</i> ATCC 33907 <sup>T</sup>                     | 86.46 | 86.33 | 86.84 | 86.46 | 85.69 | 86.46 |       | 116   | 144   |
| 8  | <i>A. eucrenophila</i> ATCC 23309 <sup>T</sup>              | 94.71 | 93.11 | 94.84 | 94.71 | 92.65 | 94.38 | 85.19 |       | 139   |
| 9  | <i>A. sobria</i> CIP 7433 <sup>T</sup>                      | 83.01 | 82.37 | 82.71 | 82.50 | 81.67 | 82.50 | 81.47 | 82.11 |       |
| 10 | <i>A. veronii</i> bt <i>sobria</i> CDC 0437-84              | 95.41 | 99.36 | 95.02 | 97.06 | 98.97 | 96.65 | 86.46 | 93.23 | 82.11 |
| 11 | <i>A. jandaei</i> ATCC 49568 <sup>T</sup>                   | 96.78 | 95.02 | 96.43 | 95.49 | 93.93 | 95.62 | 86.59 | 93.56 | 82.24 |
| 12 | <i>A. veronii</i> bt <i>veronii</i> ATCC 35624 <sup>T</sup> | 96.78 | 97.69 | 96.43 | 98.34 | 97.06 | 97.69 | 86.46 | 94.38 | 82.46 |
| 13 | <i>Aeromonas</i> sp. ATCC 35941 <sup>T</sup>                | 94.12 | 95.49 | 93.69 | 96.43 | 94.84 | 95.74 | 86.84 | 92.65 | 82.37 |
| 14 | <i>A. schubertii</i> ATCC 43700                             | 92.08 | 93.11 | 91.62 | 93.93 | 92.21 | 93.49 | 85.69 | 90.17 | 84.66 |
| 15 | <i>Aeromonas</i> sp. ATCC 43946                             | 92.52 | 94.46 | 92.65 | 94.12 | 94.12 | 94.25 | 84.16 | 90.71 | 79.60 |
| 16 | <i>A. trota</i> ATCC 49657 <sup>T</sup>                     | 96.04 | 95.02 | 95.62 | 95.74 | 94.25 | 95.41 | 86.46 | 93.69 | 81.80 |
| 17 | <i>A. allosaccharophila</i> CECT 4199 <sup>T</sup>          | 96.65 | 95.02 | 96.29 | 95.62 | 93.93 | 95.49 | 86.84 | 93.36 | 82.50 |
| 18 | <i>A. encheleia</i> CECT 4342 <sup>T</sup>                  | 96.52 | 97.55 | 96.17 | 99.11 | 96.90 | 98.47 | 86.72 | 95.14 | 82.46 |
| 19 | <i>A. popoffii</i> LMG 17541 <sup>T</sup>                   | 95.28 | 96.65 | 94.84 | 97.69 | 96.04 | 97.06 | 86.08 | 94.12 | 81.80 |
| 20 | <i>A. culicicola</i> MTCC 3249 <sup>T</sup>                 | 83.37 | 82.71 | 83.14 | 82.37 | 82.11 | 82.11 | 81.08 | 82.50 | 93.05 |
| 21 | <i>A. culicicola</i> SH                                     | 96.17 | 97.19 | 95.74 | 98.97 | 96.52 | 98.58 | 86.46 | 94.71 | 82.24 |
| 22 | <i>A. culicicola</i> SLH                                    | 83.01 | 83.37 | 82.46 | 82.59 | 82.34 | 82.12 | 81.22 | 81.43 | 84.79 |
| 23 | <i>A. caviae</i> AE-11                                      | 97.19 | 94.84 | 96.78 | 95.41 | 93.81 | 95.49 | 86.72 | 93.69 | 82.58 |
| 24 | <i>A. veronii</i> bt <i>sobria</i> AE-21                    | 97.19 | 94.84 | 96.78 | 95.41 | 93.81 | 95.49 | 86.72 | 93.69 | 82.58 |
| 25 | <i>A. caviae</i> AE-23                                      | 96.29 | 96.52 | 95.88 | 98.08 | 95.88 | 97.94 | 86.59 | 94.38 | 82.24 |
| 26 | <i>A. trota</i> AE-31                                       | 97.32 | 95.14 | 96.90 | 95.74 | 94.25 | 95.88 | 86.84 | 93.81 | 83.01 |
| 27 | <i>A. caviae</i> AE-34                                      | 86.46 | 85.43 | 86.46 | 85.43 | 84.65 | 85.19 | 93.69 | 84.04 | 81.21 |
| 28 | <i>A. caviae</i> AE-39                                      | 97.06 | 95.14 | 96.65 | 95.74 | 94.25 | 95.88 | 86.59 | 93.81 | 82.50 |
| 29 | <i>A. veronii</i> bt <i>sobria</i> AE-41                    | 97.06 | 94.71 | 96.65 | 95.28 | 93.69 | 95.41 | 86.59 | 93.56 | 82.46 |
| 30 | <i>A. schubertii</i> AE-48                                  | 96.65 | 94.38 | 96.29 | 94.84 | 93.36 | 95.02 | 86.33 | 93.36 | 82.24 |
| 31 | <i>Aeromonas</i> sp. AE-51                                  | 97.32 | 95.14 | 96.90 | 95.74 | 94.25 | 95.88 | 86.84 | 93.81 | 83.01 |
| 32 | <i>A. hydrophila</i> AE-53                                  | 97.32 | 95.02 | 96.90 | 95.49 | 93.93 | 95.62 | 86.84 | 93.81 | 82.58 |
| 33 | <i>A. hydrophila</i> AE-55                                  | 96.65 | 94.38 | 96.29 | 94.84 | 93.36 | 95.02 | 86.33 | 93.23 | 82.11 |
| 34 | <i>A. hydrophila</i> AE-57                                  | 97.32 | 94.84 | 96.90 | 95.49 | 93.93 | 95.41 | 86.72 | 93.93 | 82.71 |
| 35 | <i>A. hydrophila</i> AN-1                                   | 97.19 | 94.84 | 96.78 | 95.41 | 93.81 | 95.28 | 86.46 | 93.81 | 82.58 |
| 36 | <i>A. hydrophila</i> AN-2                                   | 97.32 | 95.02 | 96.90 | 95.49 | 93.93 | 95.41 | 86.59 | 93.81 | 82.71 |
| 37 | <i>A. hydrophila</i> AN-3                                   | 97.32 | 95.02 | 96.90 | 95.49 | 93.93 | 95.41 | 86.59 | 93.81 | 82.58 |
| 38 | <i>Aeromonas</i> sp. AN-24                                  | 97.32 | 94.84 | 96.90 | 95.49 | 93.93 | 95.62 | 87.10 | 93.81 | 82.71 |
| 39 | <i>A. hydrophila</i> AN-25                                  | 97.19 | 94.71 | 96.78 | 95.41 | 93.81 | 95.49 | 86.84 | 93.69 | 82.58 |
| 40 | <i>Aeromonas</i> sp. AN-30                                  | 97.19 | 94.84 | 96.78 | 95.41 | 93.81 | 95.41 | 86.59 | 93.69 | 82.46 |
| 41 | <i>A. hydrophila</i> AN-32                                  | 97.06 | 94.71 | 96.65 | 95.28 | 93.69 | 95.28 | 86.46 | 93.56 | 82.46 |
| 42 | <i>A. trota</i> AN-35                                       | 83.27 | 82.50 | 82.71 | 81.67 | 81.67 | 81.54 | 80.38 | 82.24 | 92.40 |
| 43 | <i>Aeromonas</i> sp. AN-46                                  | 96.90 | 94.58 | 96.52 | 95.14 | 93.56 | 95.28 | 86.59 | 93.49 | 82.50 |
| 44 | <i>A. veronii</i> bt <i>sobria</i> AN-50                    | 96.52 | 94.25 | 96.17 | 94.71 | 93.23 | 94.58 | 85.81 | 93.11 | 82.11 |
| 45 | <i>A. jandaei</i> AN-51                                     | 97.19 | 94.84 | 96.78 | 95.41 | 93.81 | 95.49 | 86.72 | 93.69 | 82.58 |
| 46 | <i>A. veronii</i> 211c                                      | 96.04 | 97.32 | 95.62 | 98.58 | 96.65 | 98.21 | 86.84 | 94.58 | 82.50 |
| 47 | <i>A. media</i> 345                                         | 86.59 | 85.81 | 86.46 | 85.69 | 85.19 | 85.44 | 95.14 | 84.42 | 80.50 |
| 48 | <i>A. veronii</i> CECT 4246                                 | 83.01 | 82.24 | 82.46 | 81.41 | 81.41 | 81.34 | 80.63 | 81.80 | 93.44 |
| 49 | <i>A. bestiarum</i> LMG 13448                               | 96.43 | 97.69 | 96.04 | 99.23 | 97.06 | 98.58 | 86.59 | 95.02 | 82.58 |
| 50 | <i>A. bestiarum</i> LMG 13662                               | 96.29 | 97.55 | 95.88 | 99.11 | 96.90 | 98.71 | 86.72 | 94.84 | 82.46 |
| 51 | <i>A. salmonicida</i> CECT 894 <sup>T</sup>                 | 95.41 | 99.87 | 95.02 | 96.78 | 98.47 | 96.43 | 86.46 | 92.90 | 82.24 |
| 52 | <i>Aeromonas</i> sp. Manipal A1                             | 97.19 | 94.71 | 96.78 | 95.41 | 93.81 | 95.49 | 87.10 | 93.69 | 82.58 |
| 53 | <i>Aeromonas</i> sp. BJMC                                   | 96.65 | 94.25 | 96.29 | 94.84 | 93.36 | 95.02 | 86.46 | 93.23 | 82.37 |
| 54 | <i>A. hydrophila</i> ATCC 49140                             | 97.55 | 93.56 | 97.19 | 93.93 | 92.90 | 94.38 | 85.43 | 93.11 | 81.47 |
| 55 | <i>A. bestiarum</i> ATCC 13444                              | 95.14 | 99.11 | 94.71 | 96.78 | 98.71 | 96.43 | 86.46 | 92.90 | 82.11 |
| 56 | <i>A. bestiarum</i> ATCC 23211                              | 94.84 | 98.84 | 94.46 | 96.52 | 98.47 | 96.17 | 86.21 | 92.77 | 81.67 |
| 57 | <i>A. bestiarum</i> ATCC 23213                              | 96.17 | 97.32 | 95.74 | 98.71 | 96.65 | 98.34 | 86.46 | 94.58 | 82.24 |
| 58 | <i>A. caviae</i> RK 27611                                   | 96.90 | 94.46 | 96.78 | 95.14 | 93.81 | 95.28 | 87.10 | 93.69 | 82.50 |
| 59 | <i>A. caviae</i> RK 65541                                   | 86.21 | 85.44 | 86.33 | 85.81 | 85.31 | 85.56 | 92.90 | 83.75 | 81.34 |
| 60 | <i>A. veronii</i> bv <i>sobria</i> RK 43939                 | 82.34 | 82.59 | 82.38 | 82.12 | 81.56 | 81.43 | 80.65 | 81.35 | 84.30 |
| 61 | <i>A. veronii</i> bv <i>sobria</i> RK 77343                 | 83.14 | 83.49 | 82.59 | 82.59 | 82.46 | 81.81 | 81.48 | 81.56 | 84.66 |
| 62 | <i>A. hydrophila</i> RK 217215                              | 96.43 | 93.93 | 96.04 | 94.84 | 93.11 | 94.71 | 86.33 | 92.90 | 82.50 |
| 63 | <i>A. hydrophila</i> RK 70363                               | 97.06 | 94.58 | 96.65 | 95.28 | 93.69 | 95.41 | 87.10 | 93.56 | 82.46 |
| 64 | <i>Aeromonas</i> sp. 1m                                     | 97.32 | 94.84 | 96.90 | 95.49 | 93.93 | 95.41 | 86.72 | 93.81 | 82.71 |
| 65 | <i>Aeromonas</i> sp. 12m                                    | 97.19 | 94.71 | 96.78 | 95.41 | 93.81 | 95.49 | 87.10 | 93.69 | 82.46 |
| 66 | <i>Aeromonas</i> sp. 13m                                    | 98.97 | 94.71 | 98.58 | 95.14 | 93.81 | 95.28 | 86.46 | 93.93 | 82.37 |
| 67 | <i>Aeromonas</i> sp. 15m                                    | 97.32 | 94.84 | 96.90 | 95.49 | 93.93 | 95.62 | 86.84 | 93.81 | 82.58 |
| 68 | <i>Aeromonas</i> sp. 17m                                    | 99.74 | 95.49 | 99.36 | 95.88 | 94.58 | 96.04 | 86.72 | 94.71 | 83.01 |
| 69 | <i>Aeromonas</i> sp. 19m                                    | 97.32 | 94.84 | 96.90 | 95.49 | 93.93 | 95.62 | 87.23 | 93.81 | 82.58 |
| 70 | <i>A. media</i> CDC 0862-83                                 | 85.44 | 84.04 | 85.43 | 85.06 | 84.42 | 85.31 | 94.46 | 83.39 | 80.18 |
| 71 | <i>A. culicicola</i> 2238A                                  | 83.75 | 83.01 | 83.37 | 82.50 | 82.24 | 82.24 | 80.77 | 82.58 | 93.50 |
| 72 | <i>A. culicicola</i> 3037T                                  | 83.37 | 82.46 | 83.14 | 82.11 | 81.67 | 81.67 | 81.08 | 82.37 | 93.76 |





|    | 36    | 37    | 38    | 39    | 40    | 41    | 42    | 43    | 44    | 45    | 46    | 47    | 48    |
|----|-------|-------|-------|-------|-------|-------|-------|-------|-------|-------|-------|-------|-------|
| 1  | 21    | 21    | 21    | 22    | 22    | 23    | 130   | 24    | 27    | 22    | 31    | 104   | 132   |
| 2  | 39    | 39    | 40    | 41    | 40    | 41    | 136   | 42    | 45    | 40    | 21    | 110   | 138   |
| 3  | 24    | 24    | 24    | 25    | 25    | 26    | 133   | 27    | 30    | 25    | 34    | 105   | 135   |
| 4  | 35    | 35    | 35    | 36    | 36    | 37    | 141   | 38    | 41    | 36    | 11    | 111   | 143   |
| 5  | 47    | 47    | 47    | 48    | 48    | 49    | 141   | 50    | 53    | 48    | 26    | 116   | 143   |
| 6  | 36    | 36    | 34    | 35    | 36    | 37    | 142   | 37    | 42    | 35    | 14    | 114   | 145   |
| 7  | 104   | 104   | 101   | 102   | 104   | 105   | 151   | 104   | 110   | 103   | 102   | 38    | 149   |
| 8  | 48    | 48    | 48    | 49    | 49    | 50    | 138   | 51    | 54    | 49    | 42    | 122   | 140   |
| 9  | 133   | 134   | 133   | 134   | 135   | 135   | 59    | 136   | 139   | 134   | 136   | 150   | 51    |
| 10 | 41    | 41    | 39    | 40    | 41    | 42    | 134   | 42    | 47    | 40    | 18    | 109   | 137   |
| 11 | 10    | 10    | 8     | 7     | 8     | 9     | 134   | 9     | 16    | 9     | 26    | 102   | 139   |
| 12 | 28    | 28    | 28    | 29    | 29    | 30    | 137   | 31    | 34    | 29    | 12    | 107   | 137   |
| 13 | 43    | 44    | 44    | 45    | 45    | 45    | 137   | 46    | 48    | 44    | 25    | 100   | 137   |
| 14 | 62    | 63    | 63    | 64    | 64    | 64    | 128   | 65    | 67    | 63    | 46    | 108   | 128   |
| 15 | 56    | 56    | 55    | 56    | 57    | 58    | 159   | 58    | 62    | 57    | 48    | 129   | 161   |
| 16 | 14    | 14    | 12    | 11    | 12    | 13    | 133   | 13    | 20    | 13    | 24    | 104   | 136   |
| 17 | 9     | 9     | 7     | 8     | 9     | 10    | 135   | 8     | 15    | 8     | 29    | 102   | 136   |
| 18 | 28    | 28    | 28    | 29    | 29    | 30    | 136   | 31    | 34    | 29    | 6     | 105   | 138   |
| 19 | 40    | 40    | 38    | 39    | 41    | 42    | 136   | 41    | 46    | 41    | 13    | 110   | 138   |
| 20 | 128   | 128   | 128   | 129   | 130   | 130   | 12    | 131   | 133   | 129   | 133   | 151   | 10    |
| 21 | 33    | 33    | 31    | 30    | 31    | 32    | 136   | 34    | 39    | 32    | 5     | 106   | 141   |
| 22 | 130   | 131   | 128   | 127   | 129   | 129   | 120   | 131   | 135   | 129   | 127   | 133   | 123   |
| 23 | 1     | 3     | 3     | 4     | 3     | 2     | 132   | 4     | 7     | 0     | 33    | 103   | 133   |
| 24 | 1     | 3     | 3     | 4     | 3     | 2     | 132   | 4     | 7     | 0     | 33    | 103   | 133   |
| 25 | 26    | 26    | 24    | 23    | 24    | 25    | 137   | 27    | 32    | 25    | 8     | 105   | 140   |
| 26 | 4     | 4     | 2     | 3     | 4     | 5     | 130   | 5     | 10    | 3     | 30    | 102   | 131   |
| 27 | 106   | 106   | 103   | 102   | 104   | 105   | 147   | 105   | 111   | 105   | 104   | 45    | 147   |
| 28 | 10    | 10    | 6     | 5     | 8     | 9     | 132   | 9     | 16    | 9     | 24    | 102   | 137   |
| 29 | 2     | 4     | 4     | 3     | 2     | 1     | 131   | 5     | 8     | 1     | 32    | 102   | 134   |
| 30 | 5     | 7     | 7     | 6     | 5     | 4     | 134   | 8     | 11    | 4     | 35    | 105   | 137   |
| 31 | 4     | 4     | 2     | 3     | 4     | 5     | 130   | 5     | 10    | 3     | 30    | 102   | 131   |
| 32 | 2     | 2     | 2     | 3     | 2     | 3     | 132   | 3     | 8     | 1     | 32    | 102   | 133   |
| 33 | 7     | 5     | 7     | 8     | 7     | 8     | 136   | 4     | 9     | 6     | 37    | 106   | 137   |
| 34 | 4     | 4     | 2     | 3     | 5     | 6     | 132   | 5     | 10    | 5     | 32    | 103   | 132   |
| 35 | 1     | 3     | 5     | 6     | 4     | 3     | 133   | 6     | 7     | 2     | 35    | 105   | 133   |
| 36 |       | 2     | 4     | 5     | 3     | 2     | 132   | 5     | 6     | 1     | 34    | 104   | 132   |
| 37 | 99.74 |       | 4     | 5     | 3     | 4     | 132   | 5     | 8     | 3     | 34    | 104   | 132   |
| 38 | 99.49 | 99.49 |       | 1     | 4     | 5     | 131   | 3     | 10    | 3     | 30    | 101   | 132   |
| 39 | 99.36 | 99.36 | 99.87 |       | 3     | 4     | 130   | 4     | 11    | 4     | 29    | 100   | 133   |
| 40 | 99.62 | 99.62 | 99.49 | 99.62 |       | 1     | 130   | 5     | 9     | 3     | 32    | 102   | 134   |
| 41 | 99.74 | 99.49 | 99.36 | 99.49 | 99.87 |       | 130   | 6     | 8     | 2     | 33    | 103   | 134   |
| 42 | 83.01 | 83.01 | 83.14 | 83.27 | 83.27 | 83.27 |       | 134   | 137   | 132   | 134   | 149   | 8     |
| 43 | 99.36 | 99.36 | 99.62 | 99.49 | 99.36 | 99.23 | 82.58 |       | 7     | 4     | 33    | 103   | 135   |
| 44 | 99.23 | 98.97 | 98.71 | 98.58 | 98.84 | 98.97 | 82.37 | 99.11 |       | 7     | 40    | 109   | 137   |
| 45 | 99.87 | 99.62 | 99.62 | 99.49 | 99.62 | 99.74 | 83.01 | 99.49 | 99.11 |       | 33    | 103   | 133   |
| 46 | 95.62 | 95.62 | 96.17 | 96.29 | 95.88 | 95.74 | 82.58 | 95.74 | 94.84 | 95.74 |       | 102   | 139   |
| 47 | 86.59 | 86.59 | 87.10 | 87.23 | 86.84 | 86.72 | 80.63 | 86.72 | 86.08 | 86.72 | 86.84 |       | 149   |
| 48 | 83.01 | 83.01 | 83.01 | 82.71 | 82.58 | 82.58 | 98.96 | 82.46 | 82.37 | 82.71 | 82.11 | 80.63 |       |
| 49 | 96.04 | 96.04 | 96.04 | 95.88 | 95.88 | 95.74 | 82.46 | 95.62 | 95.28 | 95.88 | 99.36 | 86.46 | 82.37 |
| 50 | 95.88 | 95.88 | 96.17 | 96.04 | 95.88 | 95.74 | 82.46 | 95.74 | 95.14 | 96.04 | 99.49 | 86.46 | 82.24 |
| 51 | 94.84 | 94.84 | 95.02 | 94.84 | 94.84 | 94.71 | 82.50 | 94.71 | 94.12 | 95.02 | 97.44 | 86.08 | 82.11 |
| 52 | 99.36 | 99.36 | 99.62 | 99.49 | 99.36 | 99.23 | 82.71 | 99.23 | 98.58 | 99.49 | 96.04 | 87.35 | 82.58 |
| 53 | 98.84 | 98.84 | 99.11 | 98.97 | 98.84 | 98.71 | 82.46 | 98.71 | 98.08 | 98.97 | 95.28 | 86.33 | 82.50 |
| 54 | 95.49 | 95.49 | 95.74 | 95.88 | 95.74 | 95.62 | 81.80 | 95.41 | 94.71 | 95.62 | 94.58 | 85.56 | 81.34 |
| 55 | 94.46 | 94.46 | 94.71 | 94.84 | 94.71 | 94.58 | 83.01 | 94.38 | 93.69 | 94.58 | 97.69 | 86.33 | 82.37 |
| 56 | 94.25 | 94.25 | 94.46 | 94.38 | 94.25 | 94.12 | 82.46 | 94.12 | 93.49 | 94.38 | 97.44 | 85.81 | 82.24 |
| 57 | 95.74 | 95.74 | 96.04 | 95.88 | 95.74 | 95.62 | 82.37 | 95.62 | 95.02 | 95.88 | 99.11 | 86.21 | 81.80 |
| 58 | 99.11 | 99.11 | 99.62 | 99.49 | 99.11 | 98.97 | 82.58 | 99.23 | 98.34 | 99.23 | 96.04 | 87.10 | 82.46 |
| 59 | 86.08 | 86.08 | 86.46 | 86.46 | 86.33 | 86.21 | 80.63 | 86.21 | 85.44 | 86.21 | 86.33 | 93.69 | 80.63 |
| 60 | 82.71 | 82.59 | 83.14 | 83.27 | 83.01 | 83.01 | 84.04 | 82.59 | 82.25 | 83.01 | 83.01 | 82.46 | 83.49 |
| 61 | 83.37 | 83.39 | 83.37 | 83.39 | 83.27 | 83.27 | 84.42 | 83.14 | 82.71 | 83.39 | 83.39 | 83.01 | 84.42 |
| 62 | 98.58 | 98.58 | 98.84 | 98.71 | 98.58 | 98.47 | 82.50 | 98.47 | 97.81 | 98.71 | 95.02 | 86.33 | 82.37 |
| 63 | 99.23 | 99.23 | 99.74 | 99.87 | 99.49 | 99.36 | 83.14 | 99.36 | 98.47 | 99.36 | 96.43 | 87.35 | 82.58 |
| 64 | 99.49 | 99.49 | 99.49 | 99.36 | 99.36 | 99.23 | 83.01 | 99.11 | 98.71 | 99.36 | 95.62 | 86.72 | 83.01 |
| 65 | 99.36 | 99.36 | 99.62 | 99.49 | 99.36 | 99.23 | 82.71 | 99.23 | 98.58 | 99.49 | 96.04 | 87.10 | 82.58 |
| 66 | 96.52 | 96.52 | 96.78 | 96.65 | 96.52 | 96.43 | 82.58 | 96.43 | 95.74 | 96.65 | 95.74 | 86.46 | 82.37 |
| 67 | 99.49 | 99.49 | 99.74 | 99.62 | 99.49 | 99.36 | 83.01 | 99.36 | 98.71 | 99.62 | 95.88 | 86.84 | 82.71 |
| 68 | 97.32 | 97.32 | 97.55 | 97.44 | 97.32 | 97.19 | 83.39 | 97.19 | 96.52 | 97.44 | 96.29 | 86.84 | 83.01 |
| 69 | 99.49 | 99.49 | 99.74 | 99.62 | 99.49 | 99.36 | 83.01 | 99.36 | 98.71 | 99.62 | 96.17 | 87.23 | 82.71 |
| 70 | 85.31 | 85.31 | 85.56 | 85.69 | 85.43 | 85.44 | 79.28 | 85.44 | 84.53 | 85.44 | 84.78 | 96.52 | 79.33 |
| 71 | 83.75 | 83.75 | 83.75 | 83.63 | 83.49 | 83.49 | 97.16 | 83.37 | 83.27 | 83.63 | 83.01 | 80.63 | 97.43 |
| 72 | 83.37 | 83.37 | 83.37 | 83.39 | 83.27 | 83.27 | 96.75 | 83.14 | 82.71 | 83.39 | 82.46 | 80.77 | 97.43 |

|    | 49    | 50    | 51    | 52    | 53    | 54    | 55    | 56    | 57    | 58    | 59    | 60    | 61    |
|----|-------|-------|-------|-------|-------|-------|-------|-------|-------|-------|-------|-------|-------|
| 1  | 28    | 29    | 36    | 22    | 26    | 19    | 38    | 40    | 30    | 24    | 108   | 137   | 132   |
| 2  | 18    | 19    | 1     | 41    | 45    | 50    | 7     | 9     | 21    | 43    | 114   | 135   | 128   |
| 3  | 31    | 32    | 39    | 25    | 29    | 22    | 41    | 43    | 33    | 25    | 107   | 138   | 135   |
| 4  | 6     | 7     | 25    | 36    | 40    | 47    | 25    | 27    | 10    | 38    | 110   | 140   | 135   |
| 5  | 23    | 24    | 12    | 48    | 52    | 55    | 10    | 12    | 26    | 48    | 115   | 143   | 136   |
| 6  | 11    | 10    | 28    | 35    | 39    | 44    | 28    | 30    | 13    | 37    | 112   | 144   | 141   |
| 7  | 104   | 103   | 106   | 101   | 105   | 113   | 106   | 108   | 106   | 101   | 55    | 150   | 145   |
| 8  | 39    | 40    | 55    | 49    | 53    | 54    | 55    | 56    | 42    | 49    | 126   | 146   | 143   |
| 9  | 134   | 135   | 138   | 134   | 137   | 144   | 139   | 141   | 138   | 136   | 145   | 122   | 118   |
| 10 | 17    | 16    | 4     | 40    | 44    | 49    | 2     | 4     | 18    | 42    | 113   | 135   | 130   |
| 11 | 31    | 30    | 38    | 9     | 15    | 35    | 39    | 41    | 31    | 9     | 109   | 138   | 135   |
| 12 | 9     | 10    | 19    | 29    | 33    | 40    | 19    | 21    | 13    | 31    | 111   | 136   | 131   |
| 13 | 22    | 23    | 36    | 45    | 49    | 61    | 36    | 37    | 26    | 47    | 106   | 126   | 121   |
| 14 | 43    | 44    | 55    | 63    | 68    | 77    | 57    | 58    | 47    | 66    | 117   | 129   | 125   |
| 15 | 46    | 47    | 44    | 57    | 61    | 71    | 46    | 48    | 48    | 56    | 133   | 156   | 151   |
| 16 | 29    | 28    | 38    | 13    | 19    | 41    | 37    | 39    | 29    | 13    | 107   | 134   | 131   |
| 17 | 30    | 29    | 38    | 10    | 14    | 38    | 41    | 43    | 32    | 10    | 105   | 133   | 130   |
| 18 | 3     | 4     | 20    | 29    | 33    | 42    | 20    | 22    | 7     | 31    | 108   | 135   | 130   |
| 19 | 12    | 13    | 27    | 41    | 45    | 52    | 27    | 29    | 15    | 41    | 114   | 142   | 137   |
| 20 | 131   | 132   | 134   | 130   | 132   | 141   | 133   | 134   | 134   | 131   | 146   | 126   | 120   |
| 21 | 4     | 3     | 21    | 32    | 36    | 41    | 19    | 23    | 6     | 34    | 109   | 135   | 134   |
| 22 | 131   | 130   | 128   | 126   | 134   | 143   | 129   | 129   | 131   | 129   | 136   | 14    | 9     |
| 23 | 32    | 31    | 39    | 4     | 8     | 34    | 42    | 44    | 32    | 6     | 108   | 133   | 130   |
| 24 | 32    | 31    | 39    | 4     | 8     | 34    | 42    | 44    | 32    | 6     | 108   | 133   | 130   |
| 25 | 11    | 10    | 26    | 23    | 29    | 40    | 24    | 26    | 13    | 25    | 108   | 136   | 133   |
| 26 | 29    | 28    | 37    | 3     | 7     | 33    | 39    | 41    | 29    | 5     | 107   | 131   | 128   |
| 27 | 108   | 107   | 112   | 103   | 109   | 115   | 110   | 114   | 110   | 103   | 10    | 138   | 135   |
| 28 | 29    | 28    | 37    | 7     | 13    | 33    | 37    | 39    | 29    | 7     | 109   | 136   | 133   |
| 29 | 33    | 32    | 40    | 5     | 9     | 33    | 41    | 45    | 33    | 7     | 107   | 132   | 131   |
| 30 | 36    | 35    | 43    | 8     | 12    | 36    | 44    | 48    | 36    | 10    | 110   | 135   | 134   |
| 31 | 29    | 28    | 37    | 3     | 7     | 33    | 39    | 41    | 29    | 5     | 107   | 131   | 128   |
| 32 | 31    | 30    | 38    | 3     | 7     | 33    | 41    | 43    | 31    | 5     | 107   | 133   | 130   |
| 33 | 36    | 35    | 43    | 8     | 12    | 38    | 46    | 48    | 36    | 10    | 111   | 138   | 135   |
| 34 | 31    | 32    | 41    | 5     | 9     | 34    | 43    | 45    | 33    | 5     | 108   | 134   | 129   |
| 35 | 32    | 33    | 41    | 6     | 10    | 35    | 44    | 46    | 34    | 8     | 110   | 135   | 130   |
| 36 | 31    | 32    | 40    | 5     | 9     | 35    | 43    | 45    | 33    | 7     | 109   | 134   | 129   |
| 37 | 31    | 32    | 40    | 5     | 9     | 35    | 43    | 45    | 33    | 7     | 109   | 135   | 130   |
| 38 | 31    | 30    | 39    | 3     | 7     | 33    | 41    | 43    | 31    | 3     | 106   | 132   | 129   |
| 39 | 32    | 31    | 40    | 4     | 8     | 32    | 40    | 44    | 32    | 4     | 105   | 131   | 130   |
| 40 | 32    | 32    | 40    | 5     | 9     | 33    | 41    | 45    | 33    | 7     | 107   | 133   | 131   |
| 41 | 33    | 33    | 41    | 6     | 10    | 34    | 42    | 46    | 34    | 8     | 108   | 133   | 131   |
| 42 | 135   | 135   | 136   | 133   | 135   | 140   | 132   | 135   | 137   | 134   | 149   | 124   | 121   |
| 43 | 34    | 33    | 41    | 6     | 10    | 36    | 44    | 46    | 34    | 6     | 108   | 135   | 132   |
| 44 | 37    | 38    | 46    | 11    | 15    | 41    | 49    | 51    | 39    | 13    | 114   | 139   | 134   |
| 45 | 32    | 31    | 39    | 4     | 8     | 34    | 42    | 44    | 32    | 6     | 108   | 133   | 130   |
| 46 | 5     | 4     | 20    | 31    | 37    | 42    | 18    | 20    | 7     | 31    | 107   | 133   | 130   |
| 47 | 106   | 105   | 109   | 99    | 107   | 112   | 107   | 110   | 108   | 101   | 49    | 136   | 133   |
| 48 | 137   | 138   | 139   | 134   | 136   | 145   | 137   | 138   | 140   | 135   | 149   | 127   | 121   |
| 49 |       | 1     | 19    | 32    | 36    | 43    | 19    | 21    | 4     | 34    | 109   | 135   | 130   |
| 50 | 99.87 |       | 18    | 31    | 35    | 42    | 18    | 20    | 3     | 33    | 108   | 134   | 131   |
| 51 | 97.55 | 97.69 |       | 40    | 44    | 49    | 6     | 8     | 20    | 42    | 113   | 134   | 129   |
| 52 | 95.88 | 96.04 | 94.84 |       | 8     | 34    | 42    | 41    | 32    | 4     | 108   | 132   | 127   |
| 53 | 95.41 | 95.49 | 94.38 | 98.97 |       | 38    | 46    | 48    | 36    | 10    | 112   | 137   | 135   |
| 54 | 94.46 | 94.58 | 93.69 | 95.62 | 95.14 |       | 49    | 53    | 42    | 36    | 117   | 147   | 146   |
| 55 | 97.55 | 97.69 | 99.23 | 94.58 | 94.12 | 93.69 |       | 6     | 20    | 44    | 111   | 135   | 132   |
| 56 | 97.32 | 97.44 | 98.97 | 94.71 | 93.81 | 93.23 | 99.23 |       | 22    | 44    | 117   | 137   | 130   |
| 57 | 99.49 | 99.62 | 97.44 | 95.88 | 95.41 | 94.58 | 97.44 | 97.19 |       | 34    | 111   | 135   | 132   |
| 58 | 95.62 | 95.74 | 94.58 | 99.49 | 98.71 | 95.41 | 94.38 | 94.38 | 95.62 |       | 108   | 133   | 130   |
| 59 | 86.08 | 86.21 | 85.43 | 86.21 | 85.56 | 85.06 | 85.69 | 85.06 | 85.69 | 86.21 |       | 137   | 136   |
| 60 | 82.59 | 82.71 | 82.71 | 83.14 | 82.34 | 81.22 | 82.59 | 82.34 | 82.59 | 83.01 | 82.34 |       | 17    |
| 61 | 83.39 | 83.27 | 83.37 | 83.62 | 82.59 | 81.35 | 83.14 | 83.39 | 83.14 | 83.39 | 82.46 | 97.81 |       |
| 62 | 95.14 | 95.28 | 94.12 | 98.71 | 98.21 | 95.41 | 93.81 | 93.56 | 95.14 | 98.47 | 85.56 | 82.34 | 82.71 |
| 63 | 95.74 | 95.88 | 94.71 | 99.62 | 98.84 | 95.74 | 94.71 | 94.46 | 95.74 | 99.62 | 86.46 | 83.14 | 83.37 |
| 64 | 96.04 | 95.88 | 94.71 | 99.36 | 98.84 | 95.74 | 94.46 | 94.25 | 95.74 | 99.11 | 86.21 | 82.71 | 83.37 |
| 65 | 95.88 | 96.04 | 94.84 | 99.74 | 98.97 | 95.88 | 94.58 | 94.58 | 96.04 | 99.49 | 86.21 | 82.71 | 83.37 |
| 66 | 95.62 | 95.74 | 94.84 | 96.90 | 96.17 | 97.06 | 94.58 | 94.58 | 95.62 | 96.65 | 85.69 | 82.12 | 82.59 |
| 67 | 96.04 | 96.17 | 95.02 | 99.62 | 99.11 | 95.74 | 94.71 | 94.46 | 96.04 | 99.36 | 86.33 | 83.01 | 83.39 |
| 68 | 96.43 | 96.52 | 95.62 | 97.44 | 96.90 | 97.81 | 95.41 | 95.14 | 96.43 | 97.19 | 86.46 | 82.59 | 83.14 |
| 69 | 96.04 | 96.17 | 95.02 | 99.87 | 99.11 | 95.74 | 94.71 | 94.71 | 96.04 | 99.62 | 86.33 | 83.01 | 83.49 |
| 70 | 84.53 | 84.65 | 84.16 | 85.44 | 85.19 | 84.29 | 84.42 | 83.49 | 84.42 | 85.44 | 92.77 | 80.21 | 80.33 |
| 71 | 83.27 | 83.14 | 82.71 | 83.63 | 83.39 | 82.24 | 82.58 | 82.58 | 82.71 | 83.37 | 81.08 | 84.17 | 85.20 |
| 72 | 82.71 | 82.58 | 82.50 | 83.39 | 83.01 | 81.67 | 82.37 | 82.37 | 82.50 | 83.14 | 81.21 | 83.63 | 84.66 |

|    | 62    | 63    | 64    | 65    | 66    | 67    | 68    | 69    | 70    | 71    | 72  |
|----|-------|-------|-------|-------|-------|-------|-------|-------|-------|-------|-----|
| 1  | 28    | 23    | 21    | 22    | 8     | 21    | 2     | 21    | 114   | 125   | 128 |
| 2  | 47    | 42    | 40    | 41    | 41    | 40    | 35    | 40    | 125   | 132   | 135 |
| 3  | 31    | 26    | 24    | 25    | 11    | 24    | 5     | 24    | 113   | 128   | 131 |
| 4  | 40    | 37    | 35    | 36    | 38    | 35    | 32    | 35    | 117   | 136   | 139 |
| 5  | 54    | 49    | 47    | 48    | 48    | 47    | 42    | 47    | 122   | 138   | 141 |
| 6  | 41    | 36    | 36    | 35    | 37    | 34    | 31    | 34    | 115   | 138   | 141 |
| 7  | 107   | 101   | 103   | 101   | 106   | 102   | 103   | 100   | 43    | 148   | 147 |
| 8  | 55    | 50    | 48    | 49    | 47    | 48    | 41    | 48    | 130   | 134   | 137 |
| 9  | 136   | 135   | 133   | 135   | 137   | 134   | 132   | 134   | 154   | 50    | 48  |
| 10 | 46    | 41    | 41    | 40    | 40    | 39    | 34    | 39    | 124   | 132   | 135 |
| 11 | 17    | 6     | 12    | 9     | 27    | 10    | 23    | 8     | 115   | 132   | 135 |
| 12 | 35    | 30    | 28    | 29    | 29    | 28    | 25    | 28    | 121   | 131   | 134 |
| 13 | 51    | 46    | 44    | 45    | 52    | 44    | 46    | 44    | 116   | 132   | 135 |
| 14 | 68    | 65    | 63    | 64    | 67    | 63    | 62    | 63    | 124   | 117   | 120 |
| 15 | 63    | 57    | 56    | 57    | 64    | 56    | 58    | 56    | 135   | 155   | 158 |
| 16 | 21    | 10    | 16    | 13    | 33    | 14    | 29    | 12    | 119   | 129   | 132 |
| 17 | 16    | 9     | 11    | 10    | 30    | 9     | 24    | 9     | 115   | 129   | 132 |
| 18 | 35    | 30    | 28    | 29    | 33    | 28    | 27    | 28    | 119   | 131   | 134 |
| 19 | 46    | 40    | 40    | 41    | 43    | 40    | 37    | 40    | 124   | 131   | 134 |
| 20 | 133   | 130   | 128   | 130   | 133   | 129   | 128   | 129   | 159   | 14    | 17  |
| 21 | 38    | 31    | 33    | 32    | 34    | 31    | 28    | 31    | 120   | 134   | 137 |
| 22 | 132   | 126   | 130   | 128   | 134   | 129   | 131   | 127   | 154   | 117   | 120 |
| 23 | 10    | 5     | 5     | 4     | 26    | 3     | 20    | 3     | 114   | 126   | 129 |
| 24 | 10    | 5     | 5     | 4     | 26    | 3     | 20    | 3     | 114   | 126   | 129 |
| 25 | 31    | 22    | 26    | 23    | 31    | 24    | 27    | 22    | 120   | 133   | 136 |
| 26 | 9     | 4     | 4     | 3     | 25    | 2     | 19    | 2     | 113   | 124   | 127 |
| 27 | 109   | 101   | 105   | 103   | 106   | 104   | 103   | 102   | 59    | 145   | 144 |
| 28 | 15    | 4     | 10    | 7     | 25    | 8     | 21    | 6     | 115   | 130   | 133 |
| 29 | 11    | 4     | 6     | 5     | 27    | 4     | 21    | 4     | 113   | 127   | 130 |
| 30 | 14    | 7     | 9     | 8     | 30    | 7     | 24    | 7     | 116   | 130   | 133 |
| 31 | 9     | 4     | 4     | 3     | 25    | 2     | 19    | 2     | 113   | 124   | 127 |
| 32 | 9     | 4     | 4     | 3     | 25    | 2     | 19    | 2     | 113   | 126   | 129 |
| 33 | 14    | 9     | 9     | 8     | 30    | 7     | 24    | 7     | 117   | 130   | 133 |
| 34 | 11    | 4     | 4     | 5     | 27    | 4     | 21    | 4     | 114   | 125   | 128 |
| 35 | 12    | 7     | 5     | 6     | 28    | 5     | 22    | 5     | 116   | 126   | 129 |
| 36 | 11    | 6     | 4     | 5     | 27    | 4     | 21    | 4     | 115   | 125   | 128 |
| 37 | 11    | 6     | 4     | 5     | 27    | 4     | 21    | 4     | 115   | 125   | 128 |
| 38 | 9     | 2     | 4     | 3     | 25    | 2     | 19    | 2     | 112   | 125   | 128 |
| 39 | 10    | 1     | 5     | 4     | 26    | 3     | 20    | 3     | 111   | 126   | 129 |
| 40 | 11    | 4     | 5     | 5     | 27    | 4     | 21    | 4     | 113   | 127   | 130 |
| 41 | 12    | 5     | 6     | 6     | 28    | 5     | 22    | 5     | 114   | 127   | 130 |
| 42 | 136   | 131   | 132   | 133   | 134   | 132   | 129   | 132   | 161   | 22    | 25  |
| 43 | 12    | 5     | 7     | 6     | 28    | 5     | 22    | 5     | 114   | 128   | 131 |
| 44 | 17    | 12    | 10    | 11    | 33    | 10    | 27    | 10    | 120   | 130   | 133 |
| 45 | 10    | 5     | 5     | 4     | 26    | 3     | 20    | 3     | 114   | 126   | 129 |
| 46 | 39    | 28    | 34    | 31    | 33    | 32    | 29    | 30    | 118   | 132   | 135 |
| 47 | 107   | 99    | 103   | 101   | 105   | 102   | 102   | 100   | 27    | 149   | 148 |
| 48 | 137   | 134   | 132   | 134   | 137   | 133   | 132   | 133   | 159   | 20    | 20  |
| 49 | 38    | 33    | 31    | 32    | 34    | 31    | 28    | 31    | 120   | 130   | 133 |
| 50 | 37    | 32    | 32    | 31    | 33    | 30    | 27    | 30    | 119   | 131   | 134 |
| 51 | 46    | 41    | 41    | 40    | 40    | 39    | 34    | 39    | 124   | 133   | 136 |
| 52 | 10    | 3     | 5     | 2     | 24    | 3     | 20    | 1     | 114   | 126   | 129 |
| 53 | 14    | 9     | 9     | 8     | 30    | 7     | 24    | 7     | 116   | 129   | 132 |
| 54 | 36    | 33    | 33    | 32    | 23    | 33    | 17    | 33    | 123   | 138   | 141 |
| 55 | 48    | 41    | 43    | 42    | 42    | 41    | 36    | 41    | 122   | 134   | 137 |
| 56 | 50    | 43    | 45    | 42    | 42    | 43    | 38    | 41    | 128   | 134   | 137 |
| 57 | 38    | 33    | 33    | 31    | 34    | 31    | 28    | 31    | 122   | 133   | 136 |
| 58 | 12    | 3     | 7     | 4     | 26    | 5     | 22    | 3     | 114   | 128   | 131 |
| 59 | 112   | 106   | 108   | 108   | 111   | 107   | 106   | 107   | 56    | 147   | 146 |
| 60 | 137   | 132   | 134   | 134   | 140   | 133   | 135   | 133   | 155   | 123   | 126 |
| 61 | 134   | 129   | 129   | 129   | 135   | 130   | 132   | 128   | 154   | 115   | 118 |
| 62 |       | 11    | 9     | 10    | 32    | 9     | 26    | 9     | 118   | 130   | 133 |
| 63 | 98.58 |       | 6     | 3     | 25    | 4     | 21    | 2     | 112   | 127   | 130 |
| 64 | 98.84 | 99.23 |       | 5     | 27    | 4     | 21    | 4     | 114   | 125   | 128 |
| 65 | 98.71 | 99.62 | 99.36 |       | 24    | 3     | 20    | 1     | 114   | 127   | 130 |
| 66 | 95.88 | 96.78 | 96.52 | 96.90 |       | 25    | 6     | 23    | 119   | 130   | 133 |
| 67 | 98.84 | 99.49 | 99.49 | 99.62 | 96.78 |       | 19    | 2     | 113   | 126   | 129 |
| 68 | 96.65 | 97.32 | 97.32 | 97.44 | 99.23 | 97.55 |       | 19    | 114   | 125   | 128 |
| 69 | 98.84 | 99.74 | 99.49 | 99.87 | 97.06 | 99.74 | 97.55 |       | 113   | 126   | 129 |
| 70 | 84.78 | 85.56 | 85.44 | 85.44 | 84.65 | 85.43 | 85.44 | 85.43 |       | 158   | 157 |
| 71 | 83.27 | 83.49 | 83.75 | 83.49 | 83.27 | 83.63 | 83.75 | 83.63 | 79.46 |       | 3   |
| 72 | 82.71 | 83.27 | 83.37 | 83.27 | 82.71 | 83.39 | 83.37 | 83.39 | 79.60 | 99.61 |     |
