# Supplementary material for: luxRI homologs are universally present in the genus Aeromonas
Source: PubMed Central journal article supplement (PMC2180181; doi:10.1186/1471-2180-7-93), 2007-10-23
Supplement: 1471-2180-7-93-S2.pdf [file 1471-2180-7-93-S2.pdf]

**Additional Table 2: Similarity Matrix for the *luxI* homologs.** Percentage sequence similarity (lower left) and number of nucleotide differences (top right).

|                                                | 1     | 2     | 3     | 4     | 5     | 6     | 7     | 8     | 9     | 10    | 11    | 12    | 13    | 14    | 15    | 16    | 17    | 18    | 19    |
|------------------------------------------------|-------|-------|-------|-------|-------|-------|-------|-------|-------|-------|-------|-------|-------|-------|-------|-------|-------|-------|-------|
| 1 <i>A. hydrophila</i> (X89469)                |       | 74    | 13    | 47    | 74    | 178   | 69    | 184   | 148   | 41    | 63    | 41    | 33    | 35    | 46    | 39    | 181   | 40    | 181   |
| 2 <i>A. salmonicida</i> (U65741)               | 88.14 |       | 70    | 53    | 13    | 176   | 44    | 179   | 147   | 67    | 77    | 72    | 60    | 62    | 77    | 64    | 179   | 59    | 178   |
| 3 <i>A. hydrophila</i> ATCC 7966 <sup>T</sup>  | 97.90 | 88.67 |       | 43    | 70    | 179   | 66    | 182   | 143   | 42    | 60    | 40    | 34    | 36    | 47    | 40    | 179   | 35    | 179   |
| 4 <i>A. bestiarum</i> ATCC 51108 <sup>T</sup>  | 92.47 | 91.43 | 93.11 |       | 54    | 184   | 43    | 187   | 147   | 55    | 67    | 57    | 52    | 54    | 63    | 58    | 183   | 46    | 184   |
| 5 <i>A. hydrophila</i> CDC 0434-84             | 88.14 | 97.90 | 88.67 | 91.34 |       | 171   | 44    | 176   | 144   | 66    | 78    | 70    | 59    | 61    | 76    | 63    | 178   | 58    | 177   |
| 6 <i>A. sobria</i> CIP 7433 <sup>T</sup>       | 71.43 | 71.47 | 71.27 | 70.47 | 72.29 |       | 179   | 61    | 99    | 177   | 182   | 178   | 172   | 173   | 185   | 171   | 64    | 176   | 60    |
| 7 <i>A. popoffii</i> LMG 17541 <sup>T</sup>    | 88.83 | 92.87 | 89.42 | 93.11 | 92.87 | 71.27 |       | 181   | 152   | 71    | 82    | 73    | 65    | 67    | 80    | 69    | 181   | 60    | 180   |
| 8 <i>A. culicicola</i> MTCC 3249 <sup>T</sup>  | 70.47 | 71.27 | 70.50 | 69.68 | 71.47 | 90.45 | 70.66 |       | 129   | 180   | 186   | 184   | 177   | 178   | 191   | 176   | 10    | 180   | 6     |
| 9 <i>A. veronii</i> bt <i>sobria</i> AE-21     | 76.24 | 76.41 | 77.05 | 76.41 | 76.66 | 84.36 | 75.36 | 79.61 |       | 144   | 153   | 145   | 146   | 147   | 154   | 149   | 130   | 143   | 127   |
| 10 <i>Aeromonas</i> sp. AE-51                  | 93.42 | 89.24 | 93.26 | 91.17 | 89.41 | 71.27 | 88.49 | 71.06 | 76.62 |       | 35    | 20    | 19    | 17    | 26    | 19    | 178   | 25    | 178   |
| 11 <i>A. hydrophila</i> AE-53                  | 89.76 | 87.48 | 90.34 | 89.21 | 87.44 | 70.36 | 86.67 | 70    | 75.32 | 94.35 |       | 43    | 36    | 36    | 40    | 38    | 183   | 39    | 183   |
| 12 <i>A. hydrophila</i> AE-57                  | 93.43 | 88.46 | 93.53 | 90.78 | 88.67 | 71.43 | 88.30 | 70.47 | 76.49 | 96.76 | 93.07 |       | 26    | 24    | 17    | 28    | 181   | 30    | 181   |
| 13 <i>A. hydrophila</i> AN-1                   | 94.67 | 90.38 | 94.50 | 91.59 | 90.45 | 72.39 | 89.49 | 71.31 | 76.33 | 96.92 | 94.21 | 95.79 |       | 2     | 29    | 6     | 174   | 20    | 174   |
| 14 <i>A. hydrophila</i> AN-2                   | 94.39 | 90.06 | 94.23 | 91.34 | 90.23 | 72.23 | 89.26 | 71.43 | 76.41 | 97.27 | 94.21 | 96.15 | 99.68 |       | 27    | 4     | 175   | 22    | 175   |
| 15 <i>Aeromonas</i> sp. AN-24                  | 92.56 | 87.54 | 92.47 | 89.81 | 87.70 | 70.30 | 87.18 | 69.34 | 75.28 | 95.79 | 93.50 | 97.27 | 95.35 | 95.63 |       | 31    | 188   | 35    | 188   |
| 16 <i>A. hydrophila</i> AN-32                  | 93.69 | 89.64 | 93.53 | 90.62 | 89.81 | 72.29 | 88.83 | 71.47 | 76.08 | 96.92 | 93.82 | 95.47 | 99.04 | 99.36 | 95.03 |       | 173   | 26    | 173   |
| 17 <i>A. trota</i> AN-35                       | 70.66 | 71.27 | 71.27 | 70.33 | 71.43 | 89.88 | 70.66 | 98.44 | 79.46 | 71.38 | 70.48 | 70.66 | 72.07 | 71.63 | 69.52 | 72.23 |       | 177   | 4     |
| 18 <i>Aeromonas</i> sp. AN-46                  | 93.53 | 90.45 | 94.39 | 92.56 | 90.62 | 71.47 | 90.38 | 71.11 | 77.05 | 95.95 | 93.66 | 95.19 | 96.76 | 96.48 | 94.39 | 95.79 | 71.31 |       | 177   |
| 19 <i>A. veronii</i> CECT 4246                 | 70.66 | 71.43 | 71.27 | 70.47 | 71.31 | 90.52 | 71.11 | 99.07 | 80.13 | 71.38 | 70.48 | 70.66 | 72.07 | 71.63 | 69.52 | 72.23 | 99.37 | 71.31 |       |
| 20 <i>A. bestiarum</i> LMG 13448               | 70.66 | 71.43 | 71.27 | 70.47 | 71.31 | 90.52 | 71.11 | 99.07 | 80.13 | 71.38 | 70.48 | 70.66 | 72.07 | 71.63 | 69.52 | 72.23 | 99.37 | 71.31 | 100   |
| 21 <i>A. bestiarum</i> LMG 13662               | 71.11 | 71.31 | 71.43 | 70.33 | 71.47 | 90.45 | 71.27 | 98.90 | 79.77 | 71.27 | 70.36 | 71.11 | 72.23 | 72.07 | 69.68 | 72.39 | 99.53 | 71.47 | 99.84 |
| 22 <i>A. salmonicida</i> CECT 894 <sup>T</sup> | 88.51 | 99.52 | 89.26 | 91.91 | 98.08 | 71.63 | 93.43 | 71.43 | 76.33 | 89.63 | 87.64 | 88.83 | 90.78 | 90.45 | 88.14 | 90.23 | 71.43 | 91.02 | 71.31 |
| 23 <i>Aeromonas</i> sp. Manipal A1             | 94.39 | 90.45 | 94.23 | 91.59 | 90.62 | 72.44 | 89.26 | 71.47 | 76.49 | 97.27 | 94.47 | 96.48 | 98.71 | 98.40 | 96.31 | 97.73 | 72.23 | 96.48 | 72.23 |
| 24 <i>Aeromonas</i> sp. BJMC                   | 94.39 | 90.62 | 94.50 | 91.91 | 90.78 | 72.23 | 89.64 | 71.27 | 76.49 | 97.43 | 94.36 | 96.61 | 98.54 | 98.54 | 95.79 | 97.90 | 71.47 | 96.92 | 71.47 |
| 25 <i>A. hydrophila</i> ATCC 49140             | 98.24 | 88.46 | 98.40 | 92.72 | 88.67 | 70.33 | 89.42 | 70.15 | 76.08 | 93.26 | 90.02 | 93.53 | 94.82 | 94.50 | 92.72 | 93.85 | 70.47 | 94.07 | 70.47 |
| 26 <i>A. bestiarum</i> ATCC 13444              | 88.51 | 97.43 | 88.83 | 91.43 | 99.19 | 72.23 | 93.11 | 71.47 | 76.33 | 89.47 | 87.48 | 88.83 | 90.62 | 90.38 | 87.86 | 90.06 | 71.43 | 90.78 | 71.31 |
| 27 <i>A. bestiarum</i> ATCC 23211              | 88.46 | 96.61 | 88.67 | 91.02 | 98.08 | 72.07 | 92.72 | 71.31 | 76.49 | 89.47 | 87.48 | 88.83 | 90.45 | 90.23 | 87.86 | 89.81 | 71.27 | 90.78 | 71.43 |
| 28 <i>A. bestiarum</i> ATCC 23213              | 92.30 | 91.91 | 92.47 | 97.27 | 91.75 | 70.66 | 94.07 | 70.33 | 76.33 | 90.60 | 88.24 | 90.23 | 91.18 | 90.78 | 89.42 | 90.23 | 70.33 | 91.91 | 70.50 |
| 29 <i>A. hydrophila</i> RK 217215              | 93.85 | 90.06 | 93.69 | 91.34 | 89.81 | 72.07 | 89.42 | 71.43 | 76.66 | 96.47 | 95.17 | 95.47 | 97.90 | 97.58 | 95.03 | 96.92 | 71.63 | 96.31 | 71.63 |
| 30 <i>Aeromonas</i> sp. 1m                     | 95.35 | 90.62 | 94.82 | 92.47 | 90.45 | 71.63 | 90.23 | 71.11 | 77.37 | 96.60 | 93.50 | 96.15 | 98.08 | 98.08 | 95.63 | 97.43 | 71.31 | 97.43 | 71.31 |
| 31 <i>Aeromonas</i> sp. 12m                    | 95.19 | 90.45 | 94.67 | 92.30 | 90.38 | 71.31 | 90.06 | 70.50 | 77.05 | 96.15 | 93.07 | 95.63 | 97.90 | 97.58 | 95.19 | 96.92 | 71.27 | 97.27 | 71.27 |
| 32 <i>Aeromonas</i> sp. 13m                    | 97.43 | 88.51 | 97.90 | 92.47 | 88.51 | 70.30 | 88.83 | 69.52 | 76.41 | 92.55 | 90.02 | 93.27 | 93.85 | 93.53 | 92.15 | 92.87 | 70.30 | 93.53 | 70.30 |
| 33 <i>Aeromonas</i> sp. 15m                    | 95.47 | 90.78 | 95.03 | 92.56 | 90.62 | 71.63 | 90.38 | 71.11 | 77.37 | 96.47 | 93.40 | 95.95 | 98.24 | 97.90 | 95.47 | 97.27 | 71.31 | 97.58 | 71.31 |
| 34 <i>Aeromonas</i> sp. 19m                    | 95.03 | 90.38 | 94.50 | 92.15 | 90.23 | 71.63 | 89.81 | 71.11 | 77.37 | 96.30 | 93.50 | 95.47 | 97.73 | 97.43 | 95.35 | 97.12 | 71.31 | 97.12 | 71.31 |
| 35 <i>A. culicicola</i> 2238A                  | 70.66 | 71.43 | 71.27 | 70.47 | 71.31 | 90.52 | 71.11 | 98.44 | 80.44 | 71.38 | 70    | 70.66 | 71.63 | 71.47 | 69.52 | 72.07 | 98.12 | 71.43 | 98.74 |
| 36 <i>A. culicicola</i> 3037T                  | 70.50 | 71.27 | 71.11 | 70.30 | 71.43 | 90.30 | 70.66 | 98.12 | 80.13 | 71.22 | 69.54 | 70.50 | 71.47 | 71.31 | 69.36 | 71.63 | 97.79 | 71.27 | 98.44 |

|    | 20                                          | 21    | 22    | 23    | 24    | 25    | 26    | 27    | 28    | 29    | 30    | 31    | 32    | 33    | 34    | 35    | 36    |     |
|----|---------------------------------------------|-------|-------|-------|-------|-------|-------|-------|-------|-------|-------|-------|-------|-------|-------|-------|-------|-----|
| 1  | <i>A. hydrophila</i> (X89469)               | 181   | 180   | 71    | 35    | 35    | 11    | 71    | 72    | 48    | 38    | 29    | 30    | 16    | 28    | 31    | 181   | 182 |
| 2  | <i>A. salmonicida</i> (U65741)              | 178   | 177   | 3     | 59    | 58    | 72    | 16    | 21    | 50    | 62    | 58    | 59    | 71    | 57    | 60    | 178   | 179 |
| 3  | <i>A. hydrophila</i> ATCC 7966 <sup>T</sup> | 179   | 178   | 67    | 36    | 34    | 10    | 69    | 70    | 47    | 39    | 32    | 33    | 13    | 31    | 34    | 179   | 180 |
| 4  | <i>A. bestiarum</i> ATCC 51108 <sup>T</sup> | 184   | 183   | 50    | 52    | 50    | 45    | 53    | 56    | 17    | 54    | 47    | 48    | 47    | 46    | 49    | 184   | 185 |
| 5  | <i>A. hydrophila</i> CDC 0434-84            | 177   | 176   | 12    | 58    | 57    | 70    | 5     | 12    | 51    | 63    | 59    | 60    | 71    | 58    | 61    | 177   | 178 |
| 6  | <i>A. sobria</i> CIP 7433 <sup>T</sup>      | 60    | 61    | 175   | 170   | 173   | 183   | 173   | 174   | 181   | 174   | 175   | 177   | 185   | 175   | 175   | 60    | 62  |
| 7  | <i>A. popoffii</i> LMG 17541 <sup>T</sup>   | 180   | 179   | 41    | 67    | 64    | 66    | 43    | 45    | 37    | 66    | 61    | 62    | 69    | 60    | 63    | 180   | 181 |
| 8  | <i>A. culicicola</i> MTCC 3249 <sup>T</sup> | 6     | 7     | 178   | 176   | 179   | 186   | 176   | 177   | 183   | 178   | 180   | 182   | 188   | 180   | 180   | 10    | 12  |
| 9  | <i>A. veronii</i> bt <i>sobria</i> AE-21    | 127   | 128   | 146   | 145   | 145   | 149   | 146   | 145   | 146   | 144   | 141   | 143   | 147   | 141   | 141   | 125   | 127 |
| 10 | <i>Aeromonas</i> sp. AE-51                  | 178   | 177   | 64    | 17    | 16    | 42    | 65    | 65    | 58    | 22    | 21    | 24    | 46    | 22    | 23    | 178   | 179 |
| 11 | <i>A. hydrophila</i> AE-53                  | 183   | 182   | 76    | 34    | 35    | 62    | 77    | 77    | 73    | 30    | 40    | 43    | 62    | 41    | 40    | 186   | 187 |
| 12 | <i>A. hydrophila</i> AE-57                  | 181   | 180   | 69    | 22    | 21    | 40    | 69    | 69    | 61    | 28    | 24    | 27    | 42    | 25    | 28    | 181   | 182 |
| 13 | <i>A. hydrophila</i> AN-1                   | 174   | 173   | 57    | 8     | 9     | 32    | 58    | 59    | 55    | 13    | 12    | 13    | 38    | 11    | 14    | 175   | 176 |
| 14 | <i>A. hydrophila</i> AN-2                   | 175   | 174   | 59    | 10    | 9     | 34    | 60    | 61    | 57    | 15    | 12    | 15    | 40    | 13    | 16    | 176   | 177 |
| 15 | <i>Aeromonas</i> sp. AN-24                  | 188   | 187   | 74    | 23    | 26    | 45    | 75    | 75    | 66    | 31    | 27    | 30    | 49    | 28    | 29    | 188   | 189 |
| 16 | <i>A. hydrophila</i> AN-32                  | 173   | 172   | 61    | 14    | 13    | 38    | 62    | 63    | 61    | 19    | 16    | 19    | 44    | 17    | 18    | 174   | 175 |
| 17 | <i>A. trota</i> AN-35                       | 4     | 3     | 178   | 173   | 176   | 184   | 178   | 179   | 183   | 175   | 177   | 179   | 185   | 177   | 177   | 12    | 14  |
| 18 | <i>Aeromonas</i> sp. AN-46                  | 177   | 176   | 56    | 22    | 19    | 37    | 57    | 57    | 50    | 23    | 16    | 17    | 40    | 15    | 18    | 178   | 179 |
| 19 | <i>A. veronii</i> CECT 4246                 | 0     | 1     | 177   | 173   | 176   | 184   | 177   | 178   | 182   | 175   | 177   | 179   | 185   | 177   | 177   | 8     | 10  |
| 20 | <i>A. bestiarum</i> LMG 13448               |       | 1     | 177   | 173   | 176   | 184   | 177   | 178   | 182   | 175   | 177   | 179   | 185   | 177   | 177   | 8     | 10  |
| 21 | <i>A. bestiarum</i> LMG 13662               | 99.84 |       | 176   | 172   | 175   | 183   | 176   | 177   | 181   | 174   | 176   | 178   | 184   | 176   | 176   | 9     | 11  |
| 22 | <i>A. salmonicida</i> CECT 894 <sup>T</sup> | 71.31 | 71.47 |       | 56    | 55    | 69    | 13    | 18    | 47    | 61    | 55    | 56    | 68    | 54    | 57    | 177   | 178 |
| 23 | <i>Aeromonas</i> sp. Manipal A1             | 72.23 | 72.39 | 91.02 |       | 7     | 34    | 57    | 59    | 55    | 13    | 14    | 15    | 38    | 13    | 16    | 173   | 174 |
| 24 | <i>Aeromonas</i> sp. BJMC                   | 71.47 | 71.63 | 91.18 | 98.87 |       | 34    | 56    | 56    | 53    | 16    | 13    | 16    | 36    | 14    | 17    | 176   | 177 |
| 25 | <i>A. hydrophila</i> ATCC 49140             | 70.47 | 70.33 | 88.83 | 94.50 | 94.50 |       | 67    | 68    | 45    | 38    | 28    | 29    | 12    | 27    | 30    | 184   | 185 |
| 26 | <i>A. bestiarum</i> ATCC 13444              | 71.31 | 71.47 | 97.90 | 90.78 | 91.02 | 89.26 |       | 7     | 48    | 60    | 56    | 57    | 68    | 55    | 58    | 177   | 178 |
| 27 | <i>A. bestiarum</i> ATCC 23211              | 71.43 | 71.31 | 97.12 | 90.45 | 91.02 | 89.10 | 98.87 |       | 51    | 60    | 57    | 58    | 69    | 56    | 59    | 178   | 179 |
| 28 | <i>A. bestiarum</i> ATCC 23213              | 70.50 | 70.66 | 92.47 | 91.18 | 91.43 | 92.72 | 92.30 | 91.75 |       | 55    | 48    | 49    | 48    | 47    | 50    | 182   | 183 |
| 29 | <i>A. hydrophila</i> RK 217215              | 71.63 | 72.07 | 90.23 | 97.90 | 97.43 | 93.85 | 90.38 | 90.38 | 91.18 |       | 19    | 20    | 42    | 18    | 21    | 176   | 177 |
| 30 | <i>Aeromonas</i> sp. 1m                     | 71.31 | 71.47 | 91.18 | 97.73 | 97.90 | 95.47 | 91.02 | 90.78 | 92.30 | 96.92 |       | 3     | 33    | 1     | 4     | 177   | 178 |
| 31 | <i>Aeromonas</i> sp. 12m                    | 71.27 | 71.43 | 91.02 | 97.58 | 97.43 | 95.35 | 90.78 | 90.62 | 92.15 | 96.76 | 99.52 |       | 34    | 2     | 5     | 179   | 180 |
| 32 | <i>Aeromonas</i> sp. 13m                    | 70.30 | 70.47 | 89.10 | 93.85 | 94.23 | 98.08 | 89.10 | 88.83 | 92.30 | 93.27 | 94.67 | 94.50 |       | 32    | 35    | 185   | 186 |
| 33 | <i>Aeromonas</i> sp. 15m                    | 71.31 | 71.47 | 91.34 | 97.90 | 97.73 | 95.63 | 91.18 | 91.02 | 92.47 | 97.12 | 99.84 | 99.68 | 94.82 |       | 3     | 177   | 178 |
| 34 | <i>Aeromonas</i> sp. 19m                    | 71.31 | 71.47 | 90.78 | 97.43 | 97.27 | 95.19 | 90.62 | 90.45 | 91.91 | 96.61 | 99.36 | 99.19 | 94.39 | 99.52 |       | 177   | 178 |
| 35 | <i>A. culicicola</i> 2238A                  | 98.74 | 98.58 | 71.31 | 72.23 | 71.47 | 70.47 | 71.31 | 71.43 | 70.50 | 71.47 | 71.31 | 71.27 | 70.30 | 71.31 | 71.31 |       | 2   |
| 36 | <i>A. culicicola</i> 3037T                  | 98.44 | 98.28 | 71.43 | 72.07 | 71.31 | 70.30 | 71.43 | 71.27 | 70.33 | 71.31 | 71.43 | 71.11 | 70.15 | 71.43 | 71.43 | 99.69 |     |
